# Supplementary material
Source: ML conference proceedings conference paper supplement (https://openaccess.thecvf.com/content/CVPR2023/html/Yuan_Robust_Test-Time_Adaptation_CVPR_2023_paper.html)
Supplement: Supplementary file 1 [file Yuan_Robust_Test-Time_Adaptation_CVPR_2023_supplemental.pdf]

# Supplementary Materials for Robust Test-Time Adaptation in Dynamic Scenarios

## A. Discussion

**Societal impact.** RoTTA enables adapting pre-trained models on continually changing distributions with correlatively sampled test streams without any more raw data or label requirements. Thus, our work may have a positive impact on communities to effectively deploy and adapt models in various real-world scenarios, which is economically and environmentally friendly. And since no training data is required, this protects data privacy and has potential commercial value. We carry out experiments on benchmark datasets and do not notice any societal issues. It does not involve sensitive attributes.

**Future work.** Our work suggests a few promising directions for future work. Firstly, the proposed RoTTA is a preliminary attempt to perform test-time adaptation for the more realistic test stream under the setup PTTA. One could experiment to improve the algorithm by replacing some parts of RoTTA. More importantly, we hope that with this work, we can open a path to the original goal of test-time adaptation, which is performing test-time adaptation in real-world scenarios. Thus, one could improve PTTA to make it more realistic.

**Limitations.** RoTTA achieves excellent performance on various tasks under the setup PTTA as demonstrated in Section 4 in the main paper, but we still find some limitations of it. Firstly, the adopted robust batch normalization (RBN) is a naive solution to the normalization of the correlatively sampled batch of data. This requires careful design of the value of  $\alpha$  in RBN. Secondly, we observe that during the adaptation procedure of some methods like PL [3] and TENT [5], the model collapse finally. Although we design many strategies to stabilize the adaptation and model collapse never occurs in the experiments of RoTTA, we are still missing a way to recover the model from the collapse state as a remedy. Thirdly, category similarity is only one kind of correlation. Although we conduct experiments on different datasets with Dirichlet distribution to simulate correlatively sampled test streams, we still need to validate our approach in some real-world scenarios.

## B. Sensitivity to different hyper-parameters

In this section, we conduct a detailed sensitivity analysis of the hyperparameters involved in RoTTA. All experiments are conducted on CIFAR100→CIFAR100-C, and the corruptions changes as *motion, snow, fog, shot, defocus, contrast, zoom, brightness, frost, elastic, glass, gaussian, pixelate, jpeg, and impulse*, and test streams are sampled correlatively with the Dirichlet parameter  $\delta = 0.1$ . When we investigate the sensitivity to a specific hyperparameter, other hyperparameters are fixed to the default values, i.e.,  $\lambda_t = 1.0$ ,  $\lambda_u = 1.0$ ,  $\alpha = 0.05$ , and  $\nu = 0.001$ , for all experiments.

Table A. Classification error with different value of  $\lambda_t/\lambda_u$ .

| $\lambda_t/\lambda_u$ | 0.0/2.0 | 0.5/1.5 | 1.0/1.0     | 1.5/0.5 | 2.0/0.0 |
|-----------------------|---------|---------|-------------|---------|---------|
| CIFAR100-C            | 57.5    | 36.9    | <b>35.0</b> | 35.9    | 38.9    |

**Trade-off between timeliness and uncertainty.** When updating the memory bank, we take the timeliness and uncertainty of samples into account simultaneously, and  $\lambda_t$  and  $\lambda_u$  will make a trade-off between them. In Table A, we show the results of RoTTA with varying  $\lambda_t/\lambda_u$ , i.e.,  $\lambda_t/\lambda_u \in \{0.0/2.0, 0.5/1.5, 1.0/1.0, 1.5/0.5, 2.0/0.0\}$ . When we consider both of them, the results are relatively stable (35.0-36.9%). When we only think about one side, the performance drops significantly. For example, when we set  $\lambda_t/\lambda_u = 0.0/2.0$  which means only considering uncertainty, the performance drops 22.5%. That’s because some confident samples get stuck in the memory bank, making it not work the way we design it.

Table B. Classification error with varying  $\alpha$

| $\alpha$   | 0.5  | 0.1  | 0.05        | 0.01 | 0.005 | 0.001 |
|------------|------|------|-------------|------|-------|-------|
| CIFAR100-C | 39.0 | 36.0 | <b>35.0</b> | 36.0 | 38.1  | 41.5  |

**Sensitivity to  $\alpha$ .** We show the results of RoTTA with varying  $\alpha$ , i.e.,  $\alpha \in \{0.5, 0.1, 0.05, 0.01, 0.005, 0.001\}$  in Table B. A larger value of  $\alpha$  means updating the global statistics faster and vice versa. We can see that RoTTA achieves competitive results (35.0 – 36.0%) at appropriate values of

$\alpha$ , i.e.,  $\alpha \in \{0.1, 0.05, 0.01\}$ . Updating too aggressively or too gently can lead to unreliable estimates of statistics.

Table C. Classification error with varying  $\nu$

| $\nu$      | 0.05 | 0.01 | 0.005 | 0.001       | 0.0005 | 0.0001 |
|------------|------|------|-------|-------------|--------|--------|
| CIFAR100-C | 44.8 | 39.1 | 37.1  | <b>35.0</b> | 37.6   | 43.6   |

**Sensitivity to  $\nu$ .** We show the results of RoTTA with varying  $\nu$ , i.e.,  $\nu \in \{0.05, 0.01, 0.005, 0.001, 0.0005, 0.0001\}$  in Table C. As we can see, the best performance is achieved at  $\nu = 0.001$ . Updating the teacher model too quickly or too slowly can cause performance degradation.

## C. Additional experiment details and results

### C.1 Compared methods

**BN** [4] utilizes statistics of the current batch of data to normalize their feature maps without tuning any parameters.

**PL** [3] is based on BN [4], and adopts pseudo labels to train the affine parameters in BN layers.

**TENT** [5] is the first to propose fully test-time adaptation. It adopts test-time batch normalization and utilizes entropy minimization to train the affine parameters of BN layers. We reimplement it following the released code <https://github.com/DequanWang/tent>.

**LAME** [1] adapts the output of the pre-trained model by optimizing a group of latent variables without tuning any inner parts of the model. We reimplement it following the released code <https://github.com/fiveai/LAME>.

**CoTTA** [6] considers performing test-time adaptation on continually changing distributions and propose augmentation-averaged pseudo-labels and stochastic restoration to address error accumulation and catastrophic forgetting. We reimplement it following the released code <https://github.com/qinenergy/cotta>.

**NOTE** [2] proposes instance-aware normalization and prediction-balanced reservoir sampling to stable the adaptation on temporally correlated test streams. We reimplement it following the released code <https://github.com/TaesikGong/NOTE>.

### C.2 Simulate correlatively sampling

As we described in the scenarios of autonomous driving that the car will follow more vehicles on the highway or will encounter more pedestrians on the sidewalk, so we use the same category to simulate correlation. From a macro point of view, the test distribution  $\mathcal{P}_{test}$  changes continually as  $\mathcal{P}_0, \mathcal{P}_1, \dots, \mathcal{P}_\infty$ . During the period when  $\mathcal{P}_{test} = \mathcal{P}_t$ , we adopt Dirichlet distribution to simulate correlatively sampled test stream. More specifically, we consider dividing

samples of  $\mathcal{C}$  classes into  $T$  slots. Firstly, we utilize Dirichlet distribution with parameter  $\gamma$  to generate the partition criterion  $q \in \mathbb{R}^{\mathcal{C} \times T}$ . Then for each class  $c$ , we split samples into  $T$  parts according to  $q_c$  and assign each part to each slot respectively. Finally, we concatenate all slots to simulate the correlatively sampled test stream for  $\mathcal{P}_{test} = \mathcal{P}_t$ . And as  $\mathcal{P}_{test}$  changes, we use the above method again to generate the test stream.

### C.3 Detailed results of different orders

We report the average classification error of ten different distribution changing orders in Table 6 of the main paper. And then we present the specific results here, including Table D, E, F, G, H, I, J, K, L, and M for CIFAR10→CIFAR10-C and Table N, O, P, Q, R, S, T, U, V, and W for CIFAR100→CIFAR100-C. We can see consistently superior performance of RoTTA. One thing to mention is that on DomainNet we use alphabetical order to determine the order of domain changes.

## References

- [1] Malik Boudiaf, Romain Mueller, Ismail Ben Ayed, and Luca Bertinetto. Parameter-free online test-time adaptation. In *CVPR*, pages 8344–8353, 2022. 2, 3, 4, 5, 6
- [2] Taesik Gong, Jongheon Jeong, Taewon Kim, Yewon Kim, Jinwoo Shin, and Sung-Ju Lee. Robust continual test-time adaptation: Instance-aware BN and prediction-balanced memory. In *NeurIPS*, 2022. 2, 3, 4, 5, 6
- [3] Dong-Hyun Lee et al. Pseudo-label: The simple and efficient semi-supervised learning method for deep neural networks. In *Workshop on challenges in representation learning, ICML*, volume 3, page 896, 2013. 1, 2, 3, 4, 5, 6
- [4] Zachary Nado, Shreyas Padhy, D. Sculley, Alexander D’Amour, Balaji Lakshminarayanan, and Jasper Snoek. Evaluating prediction-time batch normalization for robustness under covariate shift. *CoRR*, abs/2006.10963, 2020. 2, 3, 4, 5, 6
- [5] Dequan Wang, Evan Shelhamer, Shaoteng Liu, Bruno A. Olshausen, and Trevor Darrell. Tent: Fully test-time adaptation by entropy minimization. In *ICLR*, 2021. 1, 2, 3, 4, 5, 6
- [6] Qin Wang, Olga Fink, Luc Van Gool, and Dengxin Dai. Continual test-time domain adaptation. In *CVPR*, pages 7191–7201, 2022. 2, 3, 4, 5, 6

Table D. Average classification error of the task CIFAR10  $\rightarrow$  CIFAR10-C while continually adapting to different corruptions at the highest severity 5 with correlatively sampled test stream under the proposed setup PTTA.

| Time      | $t \rightarrow$ |             |             |             |             |             |             |             |             |             |             |             |             |             |             | Avg.                         |
|-----------|-----------------|-------------|-------------|-------------|-------------|-------------|-------------|-------------|-------------|-------------|-------------|-------------|-------------|-------------|-------------|------------------------------|
| Method    | brightness      | pixelate    | gaussian    | motion      | zoom        | glass       | impulse     | jpeg        | defocus     | elastic     | shot        | frost       | snow        | fog         | contrast    |                              |
| Source    | 9.3             | 58.5        | 72.3        | 34.8        | 42.0        | 54.3        | 72.9        | 30.3        | 46.9        | 26.6        | 65.7        | 41.3        | 25.1        | 26.0        | 46.7        | 43.5                         |
| BN [4]    | 71.1            | 75.2        | 76.8        | 74.2        | 73.7        | 80.1        | 79.3        | 77.5        | 73.8        | 77.7        | 77.2        | 73.3        | 73.8        | 72.7        | 71.7        | 75.2                         |
| PL [3]    | 71.7            | 75.9        | 80.2        | 78.4        | 80.2        | 85.2        | 85.3        | 85.4        | 85.1        | 86.7        | 87.9        | 87.9        | 88.1        | 88.3        | 87.9        | 83.6                         |
| TENT [5]  | 71.6            | 75.9        | 81.3        | 80.5        | 82.3        | 85.6        | 87.1        | 87.0        | 87.1        | 88.1        | 88.2        | 87.8        | 87.9        | 88.3        | 88.2        | 84.4                         |
| LAME [1]  | <b>5.4</b>      | 56.8        | 73.1        | 29.1        | 37.0        | 50.5        | 71.4        | <b>22.3</b> | 42.8        | <b>18.6</b> | 65.5        | 37.3        | <b>18.8</b> | <u>20.4</u> | 43.6        | 39.5                         |
| CoTTA [6] | 75.0            | 79.8        | 83.1        | 83.4        | 83.2        | 84.0        | 84.5        | 83.2        | 83.5        | 83.3        | 83.6        | 83.0        | 83.0        | 83.4        | 83.7        | 82.6                         |
| NOTE [2]  | 10.1            | 29.9        | 47.1        | <b>23.4</b> | 28.4        | 48.4        | 46.1        | 41.8        | 26.9        | 36.1        | <u>37.5</u> | 25.0        | 25.0        | 23.2        | <b>14.2</b> | 30.9                         |
| RoTTA     | 10.4            | <b>26.6</b> | <b>37.5</b> | <u>23.9</u> | <b>17.0</b> | <b>40.9</b> | <b>39.7</b> | <u>30.1</u> | <b>18.0</b> | 29.9        | <b>30.1</b> | <b>23.6</b> | <u>21.7</u> | <b>17.6</b> | <u>19.0</u> | <b>25.7<sub>(+5.2)</sub></b> |

Table E. Average classification error of the task CIFAR10  $\rightarrow$  CIFAR10-C while continually adapting to different corruptions at the highest severity 5 with correlatively sampled test stream under the proposed setup PTTA.

| Time      | $t \rightarrow$ |             |             |             |             |             |             |             |             |            |             |             |             |             |             | Avg.                         |
|-----------|-----------------|-------------|-------------|-------------|-------------|-------------|-------------|-------------|-------------|------------|-------------|-------------|-------------|-------------|-------------|------------------------------|
| Method    | jpeg            | shot        | zoom        | frost       | contrast    | fog         | defocus     | elastic     | gaussian    | brightness | glass       | impulse     | pixelate    | snow        | motion      |                              |
| Source    | 30.3            | 65.7        | 42.0        | 41.3        | 46.7        | 26.0        | 46.9        | 26.6        | 72.3        | 9.3        | 54.3        | 72.9        | 58.5        | 25.1        | 34.8        | 43.5                         |
| BN [4]    | 77.6            | 75.8        | 73.4        | 74.1        | 73.1        | 74.8        | 73.5        | 80.0        | 73.2        | 77.4       | 78.6        | 76.4        | 75.5        | 74.6        | 72.9        | 75.2                         |
| PL [3]    | 77.6            | 77.1        | 76.6        | 78.3        | 77.5        | 79.8        | 82.0        | 84.8        | 86.1        | 83.5       | 87.8        | 87.1        | 86.5        | 85.6        | 85.7        | 82.4                         |
| TENT [5]  | 78.5            | 78.2        | 79.2        | 81.8        | 84.8        | 84.8        | 86.4        | 87.3        | 87.9        | 86.7       | 87.3        | 87.8        | 87.2        | 87.5        | 87.1        | 84.8                         |
| LAME [1]  | <b>22.5</b>     | 65.2        | 37.0        | 37.1        | 44.0        | <b>20.3</b> | 41.7        | <b>18.7</b> | 72.8        | <b>5.2</b> | 51.2        | 71.5        | 57.0        | <b>19.0</b> | 29.4        | 39.5                         |
| CoTTA [6] | 78.5            | 81.0        | 82.8        | 84.1        | 84.9        | 83.4        | 83.5        | 83.5        | 84.5        | 83.3       | 84.7        | 84.6        | 83.0        | 84.4        | 83.4        | 83.3                         |
| NOTE [2]  | 35.4            | <u>36.1</u> | <u>22.1</u> | <b>21.3</b> | <b>11.6</b> | 24.8        | <u>24.5</u> | 36.0        | <u>37.7</u> | 18.4       | 49.0        | <u>47.4</u> | <u>43.9</u> | 30.4        | <u>29.2</u> | <u>31.2</u>                  |
| RoTTA     | 33.2            | <b>33.3</b> | <b>19.8</b> | <u>24.1</u> | <u>24.9</u> | <u>20.5</u> | <b>16.2</b> | 31.7        | <b>28.4</b> | 11.8       | <b>43.1</b> | <b>36.9</b> | <b>32.5</b> | <u>20.7</u> | <b>20.6</b> | <b>26.5<sub>(+4.7)</sub></b> |

Table F. Average classification error of the task CIFAR10  $\rightarrow$  CIFAR10-C while continually adapting to different corruptions at the highest severity 5 with correlatively sampled test stream under the proposed setup PTTA.

| Time      | $t \rightarrow$ |             |             |             |             |             |             |             |             |             |             |            |             |             |             | Avg.                         |
|-----------|-----------------|-------------|-------------|-------------|-------------|-------------|-------------|-------------|-------------|-------------|-------------|------------|-------------|-------------|-------------|------------------------------|
| Method    | contrast        | defocus     | gaussian    | shot        | snow        | frost       | glass       | zoom        | elastic     | jpeg        | pixelate    | brightness | impulse     | motion      | fog         |                              |
| Source    | 46.7            | 46.9        | 72.3        | 65.7        | 25.1        | 41.3        | 54.3        | 42.0        | 26.6        | 30.3        | 58.5        | 9.3        | 72.9        | 34.8        | 26.0        | 43.5                         |
| BN [4]    | 72.3            | 72.6        | 76.9        | 77.1        | 74.8        | 73.5        | 80.0        | 73.2        | 77.4        | 78.6        | 76.4        | 71.0       | 79.1        | 73.9        | 71.5        | 75.2                         |
| PL [3]    | 72.4            | 75.3        | 80.7        | 82.6        | 83.3        | 83.5        | 86.6        | 85.7        | 86.6        | 88.4        | 87.5        | 86.6       | 88.3        | 88.2        | 86.8        | 84.1                         |
| TENT [5]  | 73.5            | 77.9        | 85.5        | 86.9        | 87.6        | 87.8        | 88.3        | 87.7        | 88.6        | 89.2        | 88.5        | 88.5       | 89.3        | 88.6        | 88.6        | 86.4                         |
| LAME [1]  | 43.5            | 42.3        | 73.1        | 65.3        | <b>19.2</b> | 37.3        | 51.1        | 36.8        | <b>18.5</b> | <b>22.5</b> | 56.9        | <b>5.5</b> | 71.1        | 29.1        | <u>20.5</u> | 39.5                         |
| CoTTA [6] | 79.4            | 80.3        | 83.8        | 83.9        | 83.9        | 83.4        | 85.0        | 83.2        | 85.1        | 84.3        | 83.9        | 83.3       | 84.7        | 83.9        | 82.5        | 83.4                         |
| NOTE [2]  | <b>9.6</b>      | <u>21.8</u> | <u>40.1</u> | <b>31.0</b> | 25.5        | <u>22.6</u> | <u>44.8</u> | <u>22.8</u> | 33.2        | 39.4        | <u>33.2</u> | 18.1       | <u>50.0</u> | <u>28.3</u> | 29.8        | <u>30.0</u>                  |
| RoTTA     | <u>18.4</u>     | <b>17.9</b> | <b>38.4</b> | <u>31.9</u> | <u>23.3</u> | <b>19.8</b> | <b>40.7</b> | <b>17.4</b> | 31.4        | <u>29.8</u> | <b>27.8</b> | 11.3       | <b>43.8</b> | <b>19.7</b> | <b>18.8</b> | <b>26.0<sub>(+4.0)</sub></b> |

Table G. Average classification error of the task CIFAR10  $\rightarrow$  CIFAR10-C while continually adapting to different corruptions at the highest severity 5 with correlatively sampled test stream under the proposed setup PTTA.

| Time      | $t \rightarrow$ |             |             |             |             |             |             |             |             |             |             |             |             |             |             | Avg.                         |
|-----------|-----------------|-------------|-------------|-------------|-------------|-------------|-------------|-------------|-------------|-------------|-------------|-------------|-------------|-------------|-------------|------------------------------|
| Method    | shot            | fog         | glass       | pixelate    | snow        | elastic     | brightness  | impulse     | defocus     | frost       | contrast    | gaussian    | motion      | jpeg        | zoom        |                              |
| Source    | 65.7            | 26.0        | 54.3        | 58.5        | 25.1        | <u>26.6</u> | 9.3         | 72.9        | 46.9        | 41.3        | 46.7        | 72.3        | 34.8        | <u>30.3</u> | 42.0        | 43.5                         |
| BN [4]    | 76.4            | 72.0        | 80.4        | 76.2        | 74.8        | <u>77.0</u> | <u>71.1</u> | 79.6        | 73.8        | 74.4        | 73.0        | 77.0        | 72.5        | <u>78.3</u> | 72.5        | 75.3                         |
| PL [3]    | 77.0            | 73.3        | 82.4        | 79.8        | 81.0        | 82.3        | 79.5        | 84.4        | 82.7        | 83.5        | 83.5        | 85.5        | 84.8        | 87.0        | 84.5        | 82.1                         |
| TENT [5]  | 76.9            | 74.6        | 82.3        | 81.7        | 82.0        | 84.9        | 84.8        | 87.3        | 86.6        | 87.3        | 87.6        | 89.2        | 88.3        | 88.9        | 87.3        | 84.6                         |
| LAME [1]  | 65.3            | <b>20.6</b> | 50.9        | 56.7        | <b>19.2</b> | <b>18.8</b> | <b>5.4</b>  | 71.8        | 42.8        | 37.2        | 43.3        | 73.2        | 29.4        | <b>22.6</b> | 36.9        | 39.6                         |
| CoTTA [6] | 77.4            | 77.6        | 83.8        | 81.9        | 82.2        | 82.6        | 80.4        | 83.3        | 82.3        | 81.5        | 82.7        | 82.6        | 81.1        | 82.9        | 81.0        | 81.6                         |
| NOTE [2]  | <b>34.0</b>     | <u>20.9</u> | <b>43.1</b> | <u>36.6</u> | 24.0        | 36.4        | 12.1        | <u>48.0</u> | <u>25.9</u> | <u>23.9</u> | <b>13.4</b> | <u>38.1</u> | <b>25.0</b> | 43.2        | <u>24.2</u> | <u>29.9</u>                  |
| RoTTA     | <u>35.0</u>     | 21.1        | <u>43.9</u> | <b>29.2</b> | <u>22.1</u> | 29.7        | 10.8        | <b>44.6</b> | <b>25.3</b> | <b>22.7</b> | <u>24.6</u> | <b>29.4</b> | <u>26.9</u> | 34.4        | <b>16.1</b> | <b>27.7<sub>(+2.2)</sub></b> |

Table H. Average classification error of the task CIFAR10  $\rightarrow$  CIFAR10-C while continually adapting to different corruptions at the highest severity 5 with correlatively sampled test stream under the proposed setup PTTA.

| Time      | $t \rightarrow$ |             |             |             |             |             |            |             |             |             |             |             |             |             |             | Avg.                         |
|-----------|-----------------|-------------|-------------|-------------|-------------|-------------|------------|-------------|-------------|-------------|-------------|-------------|-------------|-------------|-------------|------------------------------|
| Method    | pixelate        | glass       | zoom        | snow        | fog         | impulse     | brightness | motion      | frost       | jpeg        | gaussian    | shot        | contrast    | defocus     | elastic     |                              |
| Source    | 58.5            | 54.3        | 42.0        | 25.1        | 26.0        | 72.9        | 9.3        | 34.8        | 41.3        | 30.3        | 72.3        | 65.7        | 46.7        | 46.9        | 26.6        | 43.5                         |
| BN [4]    | 76.0            | 79.6        | 73.3        | 75.2        | 72.9        | 79.8        | 71.1       | 73.5        | 74.1        | 78.6        | 77.4        | 76.1        | 72.0        | 73.8        | 76.4        | 75.3                         |
| PL [3]    | 76.7            | 81.3        | 77.4        | 80.3        | 81.2        | 86.3        | 83.3       | 85.9        | 86.2        | 87.7        | 88.1        | 88.4        | 87.4        | 87.6        | 87.7        | 84.4                         |
| TENT [5]  | 76.4            | 80.2        | 77.8        | 81.2        | 83.0        | 87.1        | 85.6       | 87.2        | 87.6        | 88.7        | 88.6        | 88.9        | 88.5        | 88.6        | 88.2        | 85.2                         |
| LAME [1]  | 56.9            | <u>50.7</u> | 37.0        | <b>19.0</b> | <u>20.3</u> | 71.5        | <b>5.4</b> | 29.2        | 37.2        | <b>22.5</b> | 73.0        | 65.3        | 43.8        | 42.4        | <b>18.7</b> | 39.5                         |
| CoTTA [6] | 77.1            | 83.6        | 84.1        | 84.8        | 84.4        | 85.2        | 84.0       | 84.3        | 84.9        | 84.9        | 85.0        | 84.7        | 85.3        | 84.4        | 84.3        | 84.1                         |
| NOTE [2]  | <u>27.8</u>     | 52.2        | <u>24.5</u> | 22.3        | 21.6        | <u>44.5</u> | 14.5       | <b>21.3</b> | <u>25.9</u> | 42.5        | <u>38.8</u> | <u>36.0</u> | <b>16.7</b> | <u>28.1</u> | 40.6        | <u>30.5</u>                  |
| RoTTA     | <b>25.9</b>     | <b>43.3</b> | <b>17.7</b> | <u>22.1</u> | <b>20.2</b> | <b>41.5</b> | 12.2       | <u>22.9</u> | <b>22.5</b> | 31.2        | <b>33.8</b> | <b>26.0</b> | <u>31.4</u> | <b>17.7</b> | 27.6        | <b>26.4<sub>(+4.1)</sub></b> |

Table I. Average classification error of the task CIFAR10  $\rightarrow$  CIFAR10-C while continually adapting to different corruptions at the highest severity 5 with correlatively sampled test stream under the proposed setup PTTA.

| Time      | $t \rightarrow$ |             |             |             |             |             |             |            |             |             |             |             |             |             |             | Avg.                         |
|-----------|-----------------|-------------|-------------|-------------|-------------|-------------|-------------|------------|-------------|-------------|-------------|-------------|-------------|-------------|-------------|------------------------------|
| Method    | motion          | snow        | fog         | shot        | defocus     | contrast    | zoom        | brightness | frost       | elastic     | glass       | gaussian    | pixelate    | jpeg        | impulse     |                              |
| Source    | 34.8            | 25.1        | 26.0        | 65.7        | 46.9        | 46.7        | 42.0        | <u>9.3</u> | 41.3        | <u>26.6</u> | 54.3        | 72.3        | 58.5        | 30.3        | 72.9        | 43.5                         |
| BN [4]    | 73.2            | 73.4        | 72.7        | 77.2        | 73.7        | 72.5        | 72.9        | 71.0       | 74.1        | 77.7        | 80.0        | 76.9        | 75.5        | 78.3        | 79.0        | 75.2                         |
| PL [3]    | 73.9            | 75.0        | 75.6        | 81.0        | 79.9        | 80.6        | 82.0        | 83.2       | 85.3        | 87.3        | 88.3        | 87.5        | 87.5        | 87.5        | 88.2        | 82.9                         |
| TENT [5]  | 74.3            | 77.4        | 80.1        | 86.2        | 86.7        | 87.3        | 87.9        | 87.4       | 88.2        | 89.0        | 89.2        | 89.0        | 88.3        | 89.7        | 89.2        | 86.0                         |
| LAME [1]  | 29.5            | <b>19.0</b> | <u>20.3</u> | 65.3        | 42.4        | 43.4        | 36.8        | <b>5.4</b> | 37.2        | <b>18.6</b> | 51.2        | 73.2        | 57.0        | <b>22.6</b> | 71.3        | 39.5                         |
| CoTTA [6] | 77.1            | 80.6        | 83.1        | 84.4        | 83.9        | 84.2        | 83.1        | 82.6       | 84.4        | 84.2        | 84.5        | 84.6        | 82.7        | 83.8        | 84.9        | 83.2                         |
| NOTE [2]  | <b>18.0</b>     | 22.1        | 20.6        | 35.6        | 26.9        | <b>13.6</b> | <u>26.5</u> | 17.3       | 27.2        | 37.0        | 48.3        | 38.8        | 42.6        | 41.9        | 49.7        | 31.1                         |
| RoTTA     | <u>18.1</u>     | <u>21.3</u> | <b>18.8</b> | <b>33.6</b> | <b>23.6</b> | <u>16.5</u> | <b>15.1</b> | 11.2       | <b>21.9</b> | 30.7        | <b>39.6</b> | <b>26.8</b> | <b>33.7</b> | <u>27.8</u> | <b>39.5</b> | <u>25.2</u> <sub>(6.9)</sub> |

Table J. Average classification error of the task CIFAR10  $\rightarrow$  CIFAR10-C while continually adapting to different corruptions at the highest severity 5 with correlatively sampled test stream under the proposed setup PTTA.

| Time      | $t \rightarrow$ |             |             |             |             |             |             |             |             |             |            |             |             |             |             | Avg.                         |
|-----------|-----------------|-------------|-------------|-------------|-------------|-------------|-------------|-------------|-------------|-------------|------------|-------------|-------------|-------------|-------------|------------------------------|
| Method    | frost           | impulse     | jpeg        | contrast    | zoom        | glass       | pixelate    | snow        | defocus     | motion      | brightness | elastic     | shot        | fog         | gaussian    |                              |
| Source    | 41.3            | 72.9        | <u>30.3</u> | 46.7        | 42.0        | 54.3        | 58.5        | 25.1        | 46.9        | 34.8        | 9.3        | 26.6        | 65.7        | 26.0        | 72.3        | 43.5                         |
| BN [4]    | 73.8            | 79.1        | 77.9        | 73.0        | 73.7        | 80.1        | 75.7        | 74.4        | 73.7        | 74.0        | 71.7       | 77.0        | 75.9        | 72.8        | 76.2        | 75.3                         |
| PL [3]    | 74.2            | 80.9        | 80.4        | 79.5        | 81.8        | 85.9        | 83.9        | 85.1        | 84.7        | 85.9        | 85.9       | 86.7        | 87.2        | 87.0        | 87.8        | 83.8                         |
| TENT [5]  | 73.9            | 80.3        | 81.8        | 81.6        | 83.6        | 86.3        | 85.6        | <u>85.7</u> | 86.4        | 87.7        | 87.4       | 88.8        | 88.8        | 88.5        | 88.4        | 85.0                         |
| LAME [1]  | 37.4            | 71.8        | <b>22.4</b> | 43.5        | 37.0        | 50.5        | 57.0        | <b>19.0</b> | 42.8        | 29.1        | <b>5.4</b> | <b>18.7</b> | 65.2        | <u>20.4</u> | 72.9        | 39.5                         |
| CoTTA [6] | 76.5            | 82.2        | 82.8        | 85.0        | 82.9        | 85.0        | 83.0        | 82.9        | 83.5        | 83.4        | 82.6       | 83.7        | 83.2        | 83.3        | 83.6        | 82.9                         |
| NOTE [2]  | <b>21.1</b>     | <b>41.4</b> | 36.3        | <b>10.2</b> | <u>21.7</u> | <u>46.7</u> | <u>37.5</u> | 26.4        | <u>26.1</u> | <u>21.4</u> | 14.3       | 37.9        | <u>38.5</u> | 24.4        | <u>40.7</u> | <u>29.6</u>                  |
| RoTTA     | <u>22.2</u>     | <u>44.9</u> | 35.2        | <u>18.8</u> | <b>19.7</b> | <b>41.5</b> | <b>28.5</b> | <u>23.2</u> | <b>21.2</b> | <b>18.6</b> | 12.4       | 30.0        | <b>27.4</b> | <b>20.0</b> | <b>31.2</b> | <u>26.3</u> <sub>(6.3)</sub> |

Table K. Average classification error of the task CIFAR10  $\rightarrow$  CIFAR10-C while continually adapting to different corruptions at the highest severity 5 with correlatively sampled test stream under the proposed setup PTTA.

| Time      | $t \rightarrow$ |             |             |             |             |             |             |             |             |             |             |             |            |             |             | Avg.                         |
|-----------|-----------------|-------------|-------------|-------------|-------------|-------------|-------------|-------------|-------------|-------------|-------------|-------------|------------|-------------|-------------|------------------------------|
| Method    | defocus         | motion      | zoom        | shot        | gaussian    | glass       | jpeg        | fog         | contrast    | pixelate    | frost       | snow        | brightness | elastic     | impulse     |                              |
| Source    | 46.9            | 34.8        | 42.0        | 65.7        | 72.3        | 54.3        | 30.3        | 26.0        | 46.7        | 58.5        | 41.3        | 25.1        | <u>9.3</u> | <u>26.6</u> | 72.9        | 43.5                         |
| BN [4]    | 72.8            | 72.7        | 73.3        | 77.2        | 77.3        | 80.0        | 77.6        | 72.6        | 73.3        | 76.6        | 73.8        | 74.1        | 70.3       | 77.5        | 79.0        | 75.2                         |
| PL [3]    | 73.2            | 74.6        | 76.5        | 81.7        | 82.8        | 84.6        | 85.1        | 84.6        | 86.2        | 86.4        | 86.1        | 87.1        | 86.8       | 88.4        | 88.1        | 83.5                         |
| TENT [5]  | 73.7            | 74.3        | 77.1        | 82.5        | 84.3        | 86.9        | 87.4        | 86.6        | 88.0        | 88.5        | 88.1        | 88.5        | 88.4       | 89.4        | 88.9        | 84.8                         |
| LAME [1]  | 42.5            | 29.3        | 37.0        | 65.3        | 73.2        | 50.5        | <b>22.5</b> | <u>20.5</u> | 43.5        | 56.9        | 37.1        | <b>18.9</b> | <b>5.4</b> | <b>18.5</b> | 71.3        | 39.5                         |
| CoTTA [6] | 76.3            | 79.8        | 82.4        | 83.3        | 83.8        | 84.5        | 83.1        | 82.7        | 84.7        | 82.9        | 83.0        | 83.3        | 81.4       | 83.8        | 83.8        | 82.6                         |
| NOTE [2]  | <u>18.5</u>     | <u>18.8</u> | <u>23.6</u> | <u>36.5</u> | <u>33.7</u> | <u>47.8</u> | 38.6        | 22.8        | <b>13.0</b> | <u>40.0</u> | <u>29.2</u> | 26.3        | 17.5       | 44.0        | <u>52.9</u> | <u>30.9</u>                  |
| RoTTA     | <b>17.0</b>     | <b>17.5</b> | <b>16.5</b> | <b>33.8</b> | <b>33.3</b> | <b>42.7</b> | <u>29.4</u> | <b>18.0</b> | <u>19.6</u> | <b>29.5</b> | <b>20.7</b> | <u>22.1</u> | 11.5       | 29.5        | <b>38.1</b> | <u>25.3</u> <sub>(6.6)</sub> |

Table L. Average classification error of the task CIFAR10  $\rightarrow$  CIFAR10-C while continually adapting to different corruptions at the highest severity 5 with correlatively sampled test stream under the proposed setup PTTA.

| Time      | $t \rightarrow$ |             |             |             |             |             |             |             |             |            |             |             |             |             |             | Avg.                         |
|-----------|-----------------|-------------|-------------|-------------|-------------|-------------|-------------|-------------|-------------|------------|-------------|-------------|-------------|-------------|-------------|------------------------------|
| Method    | glass           | zoom        | impulse     | fog         | snow        | jpeg        | gaussian    | frost       | shot        | brightness | contrast    | motion      | pixelate    | defocus     | elastic     |                              |
| Source    | 54.3            | 42.0        | 72.9        | 26.0        | 25.1        | <u>30.3</u> | 72.3        | 41.3        | 65.7        | 9.3        | 46.7        | 34.8        | 58.5        | 46.9        | <u>26.6</u> | 43.5                         |
| BN [4]    | 79.7            | 72.3        | 79.8        | 73.2        | 74.7        | <u>77.7</u> | 76.6        | 73.2        | 77.1        | 72.2       | 73.0        | 73.3        | 75.5        | 73.8        | 76.4        | 75.2                         |
| PL [3]    | 79.6            | 73.2        | 81.3        | 77.3        | 79.1        | 83.0        | 83.2        | 83.0        | 85.5        | 84.3       | 87.0        | 86.9        | 86.4        | 86.5        | 87.6        | 82.9                         |
| TENT [5]  | 79.5            | 74.1        | 84.2        | 82.2        | 84.5        | 86.5        | 86.7        | 85.9        | 87.2        | 86.6       | 86.8        | 87.3        | 86.9        | 87.4        | 87.3        | 84.9                         |
| LAME [1]  | 50.8            | 36.9        | 71.3        | <b>20.6</b> | <b>19.2</b> | <b>22.4</b> | 72.5        | 37.2        | 65.4        | <b>5.2</b> | 43.3        | 29.1        | 57.0        | 42.4        | <b>18.7</b> | 39.5                         |
| CoTTA [6] | 81.5            | 79.4        | 85.2        | 84.1        | 84.5        | 84.2        | 84.8        | 84.0        | 84.8        | 83.2       | 85.2        | 83.8        | 83.2        | 84.6        | 83.6        | 83.7                         |
| NOTE [2]  | <u>45.0</u>     | <u>21.2</u> | <b>42.3</b> | <u>21.0</u> | <u>21.6</u> | 38.4        | <u>36.4</u> | <u>21.4</u> | <u>33.1</u> | 16.7       | <b>14.6</b> | <u>25.4</u> | <u>43.5</u> | <u>29.1</u> | 38.5        | <u>29.9</u>                  |
| RoTTA     | <b>42.6</b>     | <b>17.6</b> | <u>48.1</u> | 23.9        | 21.9        | 32.6        | <b>32.1</b> | <b>20.7</b> | <b>30.2</b> | 12.0       | <u>21.9</u> | <b>20.0</b> | <b>33.7</b> | <b>16.4</b> | 28.1        | <u>26.8</u> <sub>(6.1)</sub> |

Table M. Average classification error of the task CIFAR10  $\rightarrow$  CIFAR10-C while continually adapting to different corruptions at the highest severity 5 with correlatively sampled test stream under the proposed setup PTTA.

| Time      | $t \rightarrow$ |             |             |             |             |             |             |             |             |             |             |             |             |             |            | Avg.                         |
|-----------|-----------------|-------------|-------------|-------------|-------------|-------------|-------------|-------------|-------------|-------------|-------------|-------------|-------------|-------------|------------|------------------------------|
| Method    | contrast        | gaussian    | defocus     | zoom        | frost       | glass       | jpeg        | fog         | pixelate    | elastic     | shot        | impulse     | snow        | motion      | brightness |                              |
| Source    | 46.7            | 72.3        | 46.9        | 42.0        | 41.3        | 54.3        | 30.3        | 26.0        | 58.5        | 26.6        | 65.7        | 72.9        | 25.1        | 34.8        | 9.3        | 43.5                         |
| BN [4]    | 72.4            | 76.2        | 73.2        | 73.7        | 73.6        | 80.0        | 77.6        | 72.6        | 76.4        | 77.7        | 77.2        | 79.9        | 73.8        | 73.9        | 70.0       | 75.2                         |
| PL [3]    | 73.0            | 78.2        | 76.7        | 79.7        | 81.6        | 85.6        | 86.0        | 85.3        | 87.2        | 88.2        | 88.3        | 88.9        | 88.5        | 89.2        | 88.2       | 84.3                         |
| TENT [5]  | 73.6            | 80.9        | 83.1        | 85.6        | 87.1        | 88.5        | 88.8        | 88.4        | 89.2        | 89.3        | 89.0        | 89.0        | 89.3        | 89.9        | 89.1       | 86.7                         |
| LAME [1]  | 43.5            | 73.2        | 42.3        | 37.0        | 37.2        | 50.5        | <b>22.5</b> | <u>20.5</u> | 57.0        | <b>18.6</b> | 65.5        | 71.5        | <b>18.8</b> | 29.1        | <b>5.6</b> | 39.5                         |
| CoTTA [6] | 79.5            | 81.4        | 83.4        | 83.6        | 83.9        | 85.0        | <b>84.0</b> | 82.8        | 84.8        | 84.8        | 84.5        | 84.7        | 84.1        | 84.4        | 82.8       | 83.6                         |
| NOTE [2]  | <b>9.6</b>      | <u>43.6</u> | <u>26.5</u> | <u>24.8</u> | <u>23.9</u> | <u>46.9</u> | 38.0        | 23.4        | <b>34.0</b> | 41.2        | <u>41.5</u> | <u>45.0</u> | 27.6        | <u>25.8</u> | 19.0       | <u>31.4</u>                  |
| RoTTA     | <u>18.4</u>     | <b>36.0</b> | <b>21.1</b> | <b>15.6</b> | <b>23.0</b> | <b>41.7</b> | 30.8        | <b>19.1</b> | <u>34.1</u> | 31.1        | <b>31.3</b> | <b>39.9</b> | 26.0        | <b>18.8</b> | 12.8       | <u>26.6</u> <sub>(4.8)</sub> |

Table N. Average classification error of the task CIFAR100  $\rightarrow$  CIFAR100-C while continually adapting to different corruptions at the highest severity 5 with correlatively sampled test stream under the proposed setup PTTA.

| Time      | $t \rightarrow$ |             |             |             |             |             |             |             |             |             |             |             |             |             |             | Avg.                         |
|-----------|-----------------|-------------|-------------|-------------|-------------|-------------|-------------|-------------|-------------|-------------|-------------|-------------|-------------|-------------|-------------|------------------------------|
| Method    | brightness      | pixelate    | gaussian    | motion      | zoom        | glass       | impulse     | jpeg        | defocus     | elastic     | shot        | frost       | snow        | fog         | contrast    |                              |
| Source    | 29.5            | 74.7        | 73.0        | <u>30.8</u> | 28.8        | 54.1        | 39.4        | 41.2        | 29.3        | 37.2        | 68.0        | 45.8        | 39.5        | 50.3        | 55.1        | 46.4                         |
| BN [4]    | 46.5            | 52.0        | 58.6        | 47.4        | 47.4        | 57.6        | 58.2        | 56.9        | 47.0        | 53.4        | 56.0        | 52.5        | 53.1        | 57.7        | <u>49.1</u> | 52.9                         |
| PL [3]    | 48.5            | 60.7        | 77.1        | 85.9        | 91.5        | 95.5        | 95.8        | 96.6        | 96.8        | 96.9        | 97.3        | 97.5        | 97.6        | 97.7        | 97.9        | 88.9                         |
| TENT [5]  | 49.8            | 69.4        | 92.2        | 96.0        | 96.7        | 97.3        | 97.5        | 97.9        | 97.5        | 97.9        | 98.0        | 98.2        | 98.2        | 98.2        | 98.2        | 92.2                         |
| LAME [1]  | <b>21.7</b>     | 75.1        | 72.7        | <b>22.9</b> | <b>20.6</b> | <u>49.0</u> | <b>32.1</b> | <b>33.3</b> | <b>21.2</b> | <b>28.0</b> | 66.8        | <b>40.0</b> | <b>30.6</b> | 43.9        | 51.3        | 40.6                         |
| CoTTA [6] | 46.8            | 48.4        | <u>54.7</u> | 48.7        | 48.6        | <u>53.5</u> | 55.4        | 52.8        | 49.8        | 51.8        | <u>53.5</u> | 52.9        | 54.1        | 56.7        | 53.6        | 52.1                         |
| NOTE [2]  | 42.6            | 53.0        | 69.9        | 52.1        | 53.3        | 70.4        | 73.1        | 76.7        | 80.8        | 96.0        | <u>97.7</u> | 97.1        | 96.6        | 97.2        | 95.8        | 76.8                         |
| RoTTA     | <u>28.4</u>     | <b>37.3</b> | <b>44.6</b> | 31.9        | <u>28.3</u> | <b>41.8</b> | 43.6        | <u>39.9</u> | <u>28.0</u> | <u>35.2</u> | <b>38.2</b> | <b>33.7</b> | <u>33.0</u> | <b>39.5</b> | <b>31.0</b> | <b>35.6<sub>(+5.0)</sub></b> |

Table O. Average classification error of the task CIFAR100  $\rightarrow$  CIFAR100-C while continually adapting to different corruptions at the highest severity 5 with correlatively sampled test stream under the proposed setup PTTA.

| Time      | $t \rightarrow$ |             |             |             |             |             |             |             |             |             |             |             |             |             |             | Avg.                         |
|-----------|-----------------|-------------|-------------|-------------|-------------|-------------|-------------|-------------|-------------|-------------|-------------|-------------|-------------|-------------|-------------|------------------------------|
| Method    | jpeg            | shot        | zoom        | frost       | contrast    | fog         | defocus     | elastic     | gaussian    | brightness  | glass       | impulse     | pixelate    | snow        | motion      |                              |
| Source    | 41.2            | 68.0        | 28.8        | 45.8        | 55.1        | 50.3        | 29.3        | 37.2        | 73.0        | 29.5        | 54.1        | 39.4        | 74.7        | 39.5        | 30.8        | 46.4                         |
| BN [4]    | 58.3            | 56.8        | 47.8        | 51.8        | 48.9        | 57.3        | 46.8        | 53.5        | 57.8        | 45.5        | 57.1        | 58.5        | 51.7        | 53.3        | 48.8        | 52.9                         |
| PL [3]    | 59.4            | 66.3        | 74.9        | 87.5        | 94.2        | 95.5        | 96.2        | 97.1        | 97.4        | 97.2        | 97.5        | 97.7        | 98.0        | 98.2        | 98.2        | 90.4                         |
| TENT [5]  | 62.0            | 79.3        | 91.7        | 95.8        | 96.9        | 97.0        | 97.4        | 97.7        | 97.6        | 97.7        | 97.9        | 97.9        | 98.0        | 97.9        | 97.9        | 93.5                         |
| LAME [1]  | <b>33.6</b>     | 66.7        | <b>21.1</b> | 39.9        | 50.6        | 43.9        | <b>21.0</b> | <b>28.6</b> | 72.5        | <b>21.6</b> | <b>48.6</b> | <b>32.5</b> | 74.5        | <b>30.6</b> | <b>22.5</b> | 40.6                         |
| CoTTA [6] | 54.6            | 54.1        | 49.6        | <u>52.1</u> | 52.7        | 58.0        | 50.3        | 53.3        | 55.0        | 49.1        | 55.4        | 55.7        | 51.0        | 54.6        | 52.1        | 53.2                         |
| NOTE [2]  | 60.4            | 63.0        | 49.9        | 55.7        | <u>47.0</u> | 65.2        | 59.4        | 76.6        | 90.9        | 87.2        | 96.8        | 97.0        | 97.3        | 96.7        | 96.8        | 76.0                         |
| RoTTA     | 43.9            | <b>45.3</b> | 31.0        | <b>37.3</b> | <b>35.7</b> | <b>41.2</b> | <u>27.7</u> | <u>34.8</u> | <b>39.7</b> | <u>26.6</u> | <b>39.5</b> | 41.9        | <b>32.0</b> | <u>33.0</u> | <u>30.5</u> | <b>36.0<sub>(+4.6)</sub></b> |

Table P. Average classification error of the task CIFAR100  $\rightarrow$  CIFAR100-C while continually adapting to different corruptions at the highest severity 5 with correlatively sampled test stream under the proposed setup PTTA.

| Time      | $t \rightarrow$ |             |             |             |             |             |             |             |             |             |             |             |             |             |             | Avg.                         |
|-----------|-----------------|-------------|-------------|-------------|-------------|-------------|-------------|-------------|-------------|-------------|-------------|-------------|-------------|-------------|-------------|------------------------------|
| Method    | contrast        | defocus     | gaussian    | shot        | snow        | frost       | glass       | zoom        | elastic     | jpeg        | pixelate    | brightness  | impulse     | motion      | fog         |                              |
| Source    | 55.1            | 29.3        | 73.0        | 68.0        | 39.5        | 45.8        | 54.1        | 28.8        | 37.2        | 41.2        | 74.7        | 29.5        | 39.4        | 30.8        | 50.3        | 46.4                         |
| BN [4]    | 49.4            | 47.2        | 58.6        | 56.2        | 52.7        | 52.0        | 57.9        | 46.1        | 54.4        | 57.7        | 50.5        | 46.2        | 58.2        | 47.6        | 58.5        | 52.9                         |
| PL [3]    | 54.8            | 64.2        | 83.3        | 92.4        | 95.5        | 96.5        | 96.9        | 96.4        | 97.2        | 97.4        | 97.8        | 97.8        | 97.9        | 97.7        | 98.0        | 90.9                         |
| TENT [5]  | 60.2            | 83.1        | 95.2        | 96.5        | 96.9        | 97.3        | 97.0        | 97.3        | 97.8        | 97.8        | 97.6        | 97.9        | 97.8        | 97.9        | 98.1        | 93.9                         |
| LAME [1]  | 51.3            | <b>21.3</b> | 72.7        | 66.3        | <b>30.2</b> | 40.0        | 48.6        | <b>20.9</b> | <b>27.7</b> | <b>33.3</b> | 75.0        | <b>21.5</b> | <b>32.2</b> | <b>22.5</b> | 43.8        | 40.5                         |
| CoTTA [6] | 52.1            | 48.6        | <u>55.1</u> | 52.7        | 53.4        | 51.9        | 55.9        | 49.2        | 53.2        | 52.8        | 49.2        | 49.7        | 56.2        | 50.7        | 58.1        | 52.6                         |
| NOTE [2]  | <b>39.5</b>     | 45.9        | 68.8        | 61.8        | 57.4        | 58.5        | 71.4        | 66.5        | 80.8        | 90.9        | 94.2        | 94.9        | 97.0        | 95.5        | 96.6        | 74.6                         |
| RoTTA     | <u>41.7</u>     | 30.5        | <b>44.9</b> | <b>40.5</b> | <u>35.4</u> | <b>34.1</b> | <b>40.5</b> | <u>28.2</u> | <u>34.5</u> | <u>39.5</u> | <b>31.1</b> | <u>26.7</u> | 43.3        | 31.4        | <b>38.8</b> | <b>36.1<sub>(+4.4)</sub></b> |

Table Q. Average classification error of the task CIFAR100  $\rightarrow$  CIFAR100-C while continually adapting to different corruptions at the highest severity 5 with correlatively sampled test stream under the proposed setup PTTA.

| Time      | $t \rightarrow$ |             |             |             |             |             |             |             |             |             |             |             |             |             |             | Avg.                         |
|-----------|-----------------|-------------|-------------|-------------|-------------|-------------|-------------|-------------|-------------|-------------|-------------|-------------|-------------|-------------|-------------|------------------------------|
| Method    | shot            | fog         | glass       | pixelate    | snow        | elastic     | brightness  | impulse     | defocus     | frost       | contrast    | gaussian    | motion      | jpeg        | zoom        |                              |
| Source    | 68.0            | 50.3        | 54.1        | 74.7        | 39.5        | 37.2        | 29.5        | 39.4        | 29.3        | 45.8        | 55.1        | 73.0        | 30.8        | 41.2        | 28.8        | 46.4                         |
| BN [4]    | 57.5            | 58.6        | 58.5        | 50.5        | 52.7        | 53.1        | 45.9        | 57.9        | 47.0        | 51.5        | 47.8        | 58.2        | 48.2        | 57.1        | 47.7        | 52.8                         |
| PL [3]    | 59.5            | 72.9        | 85.1        | 89.6        | 94.5        | 96.8        | 97.1        | 97.9        | 97.8        | 98.0        | 98.3        | 98.2        | 98.0        | 98.0        | 98.2        | 92.0                         |
| TENT [5]  | 60.3            | 81.4        | 95.0        | 96.6        | 97.0        | 97.3        | 97.3        | 97.7        | 97.7        | 97.7        | 97.8        | 97.7        | 97.6        | 97.6        | 97.9        | 93.8                         |
| LAME [1]  | 66.4            | <b>43.2</b> | 49.0        | 75.2        | <b>30.2</b> | <b>28.5</b> | <b>21.6</b> | <b>32.5</b> | <b>21.2</b> | 39.5        | 52.0        | 72.8        | <b>22.3</b> | <b>33.1</b> | <b>20.5</b> | 40.5                         |
| CoTTA [6] | 54.5            | 58.4        | <u>55.6</u> | 50.0        | 53.9        | 53.4        | 50.3        | 56.7        | 51.3        | <u>53.2</u> | 53.7        | <u>56.1</u> | 52.0        | 54.5        | 51.5        | 53.7                         |
| NOTE [2]  | 61.8            | 60.2        | 63.4        | <u>55.6</u> | 59.8        | 65.9        | 58.6        | 75.1        | 77.8        | 93.8        | 94.2        | <u>97.0</u> | 95.0        | 95.5        | 94.4        | 76.5                         |
| RoTTA     | <b>45.5</b>     | <u>44.5</u> | <b>43.5</b> | <b>35.6</b> | <u>35.1</u> | <u>35.7</u> | <u>26.2</u> | 44.0        | 29.7        | <b>34.2</b> | <b>32.0</b> | <b>40.7</b> | 31.4        | <u>39.4</u> | <u>27.7</u> | <b>36.3<sub>(+4.2)</sub></b> |

Table R. Average classification error of the task CIFAR100  $\rightarrow$  CIFAR100-C while continually adapting to different corruptions at the highest severity 5 with correlatively sampled test stream under the proposed setup PTTA.

| Time      | $t \rightarrow$ |             |             |             |             |             |             |             |             |             |             |             |             |             |             | Avg.                         |
|-----------|-----------------|-------------|-------------|-------------|-------------|-------------|-------------|-------------|-------------|-------------|-------------|-------------|-------------|-------------|-------------|------------------------------|
| Method    | pixelate        | glass       | zoom        | snow        | fog         | impulse     | brightness  | motion      | frost       | jpeg        | gaussian    | shot        | contrast    | defocus     | elastic     |                              |
| Source    | 74.7            | 54.1        | 28.8        | 39.5        | 50.3        | 39.4        | 29.5        | 30.8        | 45.8        | 41.2        | 73.0        | 68.0        | 55.1        | 29.3        | 37.2        | 46.4                         |
| BN [4]    | 51.7            | 58.6        | 47.8        | 52.9        | 57.1        | 58.2        | 45.9        | 47.6        | 52.9        | 57.8        | 57.5        | 56.7        | 49.5        | 46.1        | 54.0        | 52.9                         |
| PL [3]    | 52.4            | 68.0        | 73.4        | 87.9        | 93.7        | 96.1        | 95.7        | 96.0        | 96.5        | 96.7        | 97.5        | 97.7        | 97.7        | 97.3        | 97.7        | 89.6                         |
| TENT [5]  | 53.5            | 77.8        | 91.1        | 96.0        | 97.0        | 97.6        | 97.4        | 97.6        | 97.9        | 98.1        | 98.1        | 98.0        | 98.1        | 97.9        | 98.1        | 92.9                         |
| LAME [1]  | 74.8            | 48.2        | <b>21.1</b> | <b>30.6</b> | 43.4        | <b>32.5</b> | <b>21.6</b> | <b>23.0</b> | 39.6        | <b>33.3</b> | 72.7        | 66.5        | 51.5        | <b>20.7</b> | <b>27.5</b> | 40.5                         |
| CoTTA [6] | 49.3            | 55.1        | 49.1        | 52.9        | 56.8        | 55.7        | 49.5        | 50.0        | 53.6        | 53.4        | 54.9        | 53.9        | 53.8        | 50.1        | 53.5        | 52.8                         |
| NOTE [2]  | 52.2            | 64.9        | 47.5        | 57.0        | 61.9        | 67.3        | 60.4        | 67.8        | 77.4        | 90.6        | 97.1        | 96.8        | 92.8        | 95.9        | 96.6        | 75.1                         |
| RoTTA     | <b>36.4</b>     | <b>44.4</b> | 29.7        | <u>36.5</u> | <b>41.0</b> | 44.1        | <u>26.8</u> | <u>29.5</u> | <b>33.0</b> | <u>40.3</u> | <b>40.3</b> | <b>38.2</b> | <b>33.9</b> | <u>28.5</u> | <u>34.9</u> | <b>35.8<sub>(+4.7)</sub></b> |

Table S. Average classification error of the task CIFAR100  $\rightarrow$  CIFAR100-C while continually adapting to different corruptions at the highest severity 5 with correlatively sampled test stream under the proposed setup PTTA.

| Time      | $t \rightarrow$ |             |             |             |             |             |             |             |             |             |             |             |             |             |             | Avg.                         |
|-----------|-----------------|-------------|-------------|-------------|-------------|-------------|-------------|-------------|-------------|-------------|-------------|-------------|-------------|-------------|-------------|------------------------------|
| Method    | motion          | snow        | fog         | shot        | defocus     | contrast    | zoom        | brightness  | frost       | elastic     | glass       | gaussian    | pixelate    | jpeg        | impulse     |                              |
| Source    | 30.8            | 39.5        | 50.3        | 68.0        | 29.3        | 55.1        | 28.8        | 29.5        | 45.8        | 37.2        | 54.1        | 73.0        | 74.7        | 41.2        | 39.4        | 46.4                         |
| BN [4]    | 48.5            | 54.0        | 58.9        | 56.2        | 46.4        | 48.0        | 47.0        | 45.4        | 52.9        | 53.4        | 57.1        | 58.2        | 51.7        | 57.1        | 58.8        | 52.9                         |
| PL [3]    | 50.6            | 62.1        | 73.9        | 87.8        | 90.8        | 96.0        | 94.8        | 96.4        | 97.4        | 97.2        | 97.4        | 97.4        | 97.3        | 97.4        | 97.4        | 88.9                         |
| TENT [5]  | 53.3            | 77.6        | 93.0        | 96.5        | 96.7        | 97.5        | 97.1        | 97.5        | 97.3        | 97.2        | 97.1        | 97.7        | 97.6        | 98.0        | 98.3        | 92.8                         |
| LAME [1]  | <b>22.4</b>     | <b>30.4</b> | 43.9        | 66.3        | <b>21.3</b> | 51.7        | <b>20.6</b> | <b>21.8</b> | 39.6        | <b>28.0</b> | 48.7        | 72.8        | 74.6        | <b>33.1</b> | <b>32.3</b> | 40.5                         |
| CoTTA [6] | 49.2            | 52.7        | 56.8        | 53.0        | 48.7        | 51.7        | 49.4        | 48.7        | 52.5        | 52.2        | 54.3        | 54.9        | 49.6        | 53.4        | 56.2        | 52.2                         |
| NOTE [2]  | 45.7            | 53.0        | 58.2        | 65.6        | 54.2        | 52.0        | 59.8        | 63.5        | 74.8        | 91.8        | 98.1        | 98.3        | 96.8        | 97.0        | 98.2        | 73.8                         |
| RoTTA     | 31.8            | <u>36.7</u> | <b>40.9</b> | <b>42.1</b> | 30.0        | <b>33.6</b> | <u>27.9</u> | <u>25.4</u> | <b>32.3</b> | <u>34.0</u> | <b>38.8</b> | <b>38.7</b> | <b>31.3</b> | <u>38.0</u> | 42.9        | <b>35.0</b> <sub>(s.2)</sub> |

Table T. Average classification error of the task CIFAR100  $\rightarrow$  CIFAR100-C while continually adapting to different corruptions at the highest severity 5 with correlatively sampled test stream under the proposed setup PTTA.

| Time      | $t \rightarrow$ |             |             |             |             |             |             |             |             |             |             |             |             |             |             | Avg.                         |
|-----------|-----------------|-------------|-------------|-------------|-------------|-------------|-------------|-------------|-------------|-------------|-------------|-------------|-------------|-------------|-------------|------------------------------|
| Method    | frost           | impulse     | jpeg        | contrast    | zoom        | glass       | pixelate    | snow        | defocus     | motion      | brightness  | elastic     | shot        | fog         | gaussian    |                              |
| Source    | 45.8            | 39.4        | 41.2        | 55.1        | 28.8        | 54.1        | 74.7        | 39.5        | 29.3        | 30.8        | 29.5        | 37.2        | 68.0        | 50.3        | 73.0        | 46.4                         |
| BN [4]    | 52.9            | 58.8        | 57.6        | 48.2        | 47.4        | 57.6        | 50.9        | 52.4        | 47.0        | 47.2        | 45.1        | 54.0        | 56.4        | 57.7        | 58.2        | 52.8                         |
| PL [3]    | 56.9            | 73.3        | 86.7        | 94.4        | 95.8        | 97.3        | 97.2        | 97.4        | 97.6        | 97.4        | 97.7        | 97.6        | 97.8        | 98.3        | 98.1        | 92.2                         |
| TENT [5]  | 60.1            | 84.2        | 95.7        | 97.2        | 97.4        | 97.9        | 97.8        | 98.0        | 98.1        | 98.2        | 98.3        | 98.4        | 98.4        | 98.4        | 98.4        | 94.4                         |
| LAME [1]  | <b>39.9</b>     | <b>32.4</b> | <b>33.4</b> | 51.4        | <b>20.6</b> | 49.0        | 74.4        | <b>31.3</b> | <b>21.2</b> | <b>22.6</b> | <b>21.9</b> | <b>28.1</b> | 66.9        | 43.9        | 72.5        | 40.6                         |
| CoTTA [6] | 51.5            | 55.3        | 54.3        | 51.8        | 49.4        | 55.3        | 50.7        | 54.2        | 51.4        | 50.6        | 49.5        | 53.6        | 55.0        | 57.1        | 55.8        | 53.0                         |
| NOTE [2]  | 51.6            | 60.9        | 60.3        | <u>45.4</u> | 54.3        | 70.8        | 68.8        | 75.0        | 75.7        | 87.1        | 94.7        | 95.6        | 96.7        | 96.4        | 97.2        | 75.4                         |
| RoTTA     | <u>40.0</u>     | 46.3        | 42.8        | <b>36.4</b> | 29.2        | <b>42.3</b> | <b>33.2</b> | <u>34.4</u> | <u>28.4</u> | <u>29.2</u> | <u>26.4</u> | <u>34.5</u> | <b>38.5</b> | <b>39.8</b> | <b>39.3</b> | <b>36.0</b> <sub>(s.2)</sub> |

Table U. Average classification error of the task CIFAR100  $\rightarrow$  CIFAR100-C while continually adapting to different corruptions at the highest severity 5 with correlatively sampled test stream under the proposed setup PTTA.

| Time      | $t \rightarrow$ |             |             |             |             |             |             |             |             |             |             |             |             |             |             | Avg.                         |
|-----------|-----------------|-------------|-------------|-------------|-------------|-------------|-------------|-------------|-------------|-------------|-------------|-------------|-------------|-------------|-------------|------------------------------|
| Method    | defocus         | motion      | zoom        | shot        | gaussian    | glass       | jpeg        | fog         | contrast    | pixelate    | frost       | snow        | brightness  | elastic     | impulse     |                              |
| Source    | 29.3            | 30.8        | 28.8        | 68.0        | 73.0        | 54.1        | 41.2        | 50.3        | 55.1        | 74.7        | 45.8        | 39.5        | 29.5        | 37.2        | 39.4        | 46.4                         |
| BN [4]    | 47.1            | 48.6        | 47.8        | 56.2        | 57.6        | 57.6        | 57.6        | 57.5        | 48.7        | 50.6        | 51.8        | 53.2        | 46.9        | 53.5        | 58.8        | 52.9                         |
| PL [3]    | 48.8            | 58.7        | 69.9        | 88.0        | 95.1        | 96.6        | 96.7        | 96.9        | 97.4        | 97.4        | 98.2        | 98.2        | 98.2        | 98.3        | 98.5        | 89.1                         |
| TENT [5]  | 51.0            | 67.6        | 85.8        | 95.9        | 97.2        | 97.5        | 97.2        | 97.7        | 98.1        | 97.9        | 97.7        | 97.7        | 98.0        | 98.0        | 98.2        | 91.7                         |
| LAME [1]  | <b>21.2</b>     | <b>22.8</b> | <b>21.1</b> | 66.3        | 72.8        | 49.0        | <b>33.3</b> | 44.8        | 51.7        | 74.9        | 39.8        | <b>31.2</b> | <b>21.3</b> | <b>27.3</b> | <b>32.3</b> | 40.6                         |
| CoTTA [6] | 48.4            | 48.8        | 48.2        | 52.9        | 54.0        | 53.8        | 52.7        | 57.2        | 52.6        | 48.6        | 51.8        | 53.9        | 49.4        | 52.3        | 56.0        | 52.0                         |
| NOTE [2]  | 45.1            | 46.7        | 49.1        | 67.3        | 65.5        | 69.4        | 75.5        | 80.3        | 83.8        | 96.0        | 97.6        | 97.1        | 96.1        | 97.9        | 98.7        | 77.7                         |
| RoTTA     | 29.6            | 31.3        | 28.8        | <b>43.9</b> | <b>41.5</b> | <b>41.3</b> | <u>40.9</u> | <b>39.8</b> | <b>32.1</b> | <b>32.6</b> | <b>33.1</b> | <u>33.0</u> | <u>26.5</u> | <u>34.5</u> | 42.9        | <b>35.4</b> <sub>(s.2)</sub> |

Table V. Average classification error of the task CIFAR100  $\rightarrow$  CIFAR100-C while continually adapting to different corruptions at the highest severity 5 with correlatively sampled test stream under the proposed setup PTTA.

| Time      | $t \rightarrow$ |             |             |             |             |             |             |             |             |             |             |             |             |             |             | Avg.                         |
|-----------|-----------------|-------------|-------------|-------------|-------------|-------------|-------------|-------------|-------------|-------------|-------------|-------------|-------------|-------------|-------------|------------------------------|
| Method    | glass           | zoom        | impulse     | fog         | snow        | jpeg        | gaussian    | frost       | shot        | brightness  | contrast    | motion      | pixelate    | defocus     | elastic     |                              |
| Source    | 54.1            | 28.8        | 39.4        | 50.3        | 39.5        | 41.2        | 73.0        | 45.8        | 68.0        | 29.5        | 55.1        | 30.8        | 74.7        | 29.3        | 37.2        | 46.4                         |
| BN [4]    | 58.8            | 47.7        | 59.2        | 57.6        | 52.7        | 56.9        | 58.2        | 52.0        | 56.7        | 45.5        | 47.8        | 48.2        | 51.7        | 46.1        | 54.0        | 52.9                         |
| PL [3]    | 60.1            | 59.5        | 75.1        | 85.7        | 91.5        | 94.6        | 96.5        | 97.1        | 97.4        | 97.3        | 98.0        | 97.7        | 97.9        | 97.8        | 97.7        | 89.6                         |
| TENT [5]  | 61.6            | 71.5        | 91.0        | 95.9        | 96.6        | 97.1        | 96.9        | 97.3        | 97.4        | 97.2        | 97.9        | 98.0        | 98.1        | 97.9        | 97.8        | 92.8                         |
| LAME [1]  | 48.6            | <b>20.6</b> | <b>32.3</b> | 44.4        | <b>30.2</b> | <b>33.6</b> | 72.4        | 40.0        | 66.3        | <b>21.6</b> | 52.0        | <b>22.8</b> | 74.6        | <b>20.7</b> | <b>27.5</b> | 40.5                         |
| CoTTA [6] | 56.4            | 48.9        | 56.1        | 57.8        | 54.1        | 54.2        | 56.2        | 53.6        | 55.4        | 50.0        | 53.6        | 51.6        | 51.2        | 50.7        | 54.4        | 53.6                         |
| NOTE [2]  | 62.5            | 46.3        | 61.5        | 61.1        | 58.6        | 68.4        | 76.1        | 78.3        | 92.0        | 93.4        | 96.1        | 95.4        | 96.2        | 95.8        | 96.4        | 78.5                         |
| RoTTA     | <b>45.5</b>     | 30.0        | 45.9        | <b>42.6</b> | <u>35.3</u> | 41.8        | <b>42.2</b> | <b>34.5</b> | <b>40.2</b> | <u>27.3</u> | <b>31.3</b> | <u>30.2</u> | <b>32.7</b> | <u>28.1</u> | <u>34.9</u> | <b>36.2</b> <sub>(s.2)</sub> |

Table W. Average classification error of the task CIFAR100  $\rightarrow$  CIFAR100-C while continually adapting to different corruptions at the highest severity 5 with correlatively sampled test stream under the proposed setup PTTA.

| Time      | $t \rightarrow$ |             |             |             |             |             |             |             |             |             |             |             |             |             |             | Avg.                         |
|-----------|-----------------|-------------|-------------|-------------|-------------|-------------|-------------|-------------|-------------|-------------|-------------|-------------|-------------|-------------|-------------|------------------------------|
| Method    | contrast        | gaussian    | defocus     | zoom        | frost       | glass       | jpeg        | fog         | pixelate    | elastic     | shot        | impulse     | snow        | motion      | brightness  |                              |
| Source    | 55.1            | 73.0        | 29.3        | 28.8        | 45.8        | 54.1        | 41.2        | 50.3        | 74.7        | 37.2        | 68.0        | 39.4        | 39.5        | 30.8        | 29.5        | 46.4                         |
| BN [4]    | 49.5            | 58.8        | 47.0        | 46.5        | 52.2        | 57.6        | 57.6        | 57.6        | 51.7        | 53.5        | 56.0        | 58.5        | 53.1        | 47.6        | 46.3        | 52.9                         |
| PL [3]    | 53.6            | 70.4        | 76.0        | 85.1        | 91.2        | 95.2        | 96.0        | 97.0        | 96.9        | 97.3        | 97.3        | 97.6        | 97.5        | 97.6        | 97.7        | 89.8                         |
| TENT [5]  | 60.2            | 89.1        | 95.0        | 96.2        | 96.9        | 97.0        | 96.5        | 97.0        | 97.0        | 97.2        | 97.6        | 97.8        | 97.5        | 97.9        | 97.7        | 94.0                         |
| LAME [1]  | 51.3            | 72.5        | <b>21.5</b> | <b>21.0</b> | 39.6        | 49.0        | <b>33.3</b> | 44.8        | 74.8        | <b>28.0</b> | 66.8        | <b>32.5</b> | <b>30.6</b> | <b>22.5</b> | <b>21.4</b> | 40.6                         |
| CoTTA [6] | 52.3            | 55.3        | 49.5        | 48.1        | 52.1        | 54.8        | 52.7        | 56.9        | 50.6        | 52.6        | 53.7        | 55.8        | 54.6        | 50.6        | 50.5        | 52.7                         |
| NOTE [2]  | <b>39.1</b>     | 64.7        | 48.9        | 50.6        | 59.1        | 70.1        | 71.7        | 75.0        | 85.2        | 95.7        | 96.9        | 98.4        | 96.0        | 95.9        | 94.9        | 76.1                         |
| RoTTA     | <u>41.4</u>     | <b>46.2</b> | 30.5        | <u>28.5</u> | <b>36.0</b> | <b>40.9</b> | <u>40.5</u> | <b>39.6</b> | <b>33.0</b> | <u>35.0</u> | <b>38.2</b> | 43.1        | <u>33.9</u> | <u>30.7</u> | <u>27.1</u> | <b>36.3</b> <sub>(s.2)</sub> |
